# Supplementary material for: Apolipoprotein A-I enhances insulin-dependent and insulin-independent glucose uptake by skeletal muscle
Source: PubMed Central journal article supplement (PMC6362284; doi:10.1038/s41598-018-38014-3), 2019-02-04

**SUPPLEMENTAL INFORMATION**

**APOLIPOPROTEIN A-I ENHANCES INSULIN-DEPENDENT AND INSULIN-  
INDEPENDENT GLUCOSE UPTAKE BY SKELETAL MUSCLE**

by

Shudi Tang<sup>a</sup>, Fatiha Tabet<sup>a</sup>, Blake J. Cochran<sup>a</sup>, Luisa F. Cuesta Torres<sup>a</sup>, Ben J. Wu<sup>a</sup>, Philip J. Barter<sup>a</sup>, and Kerry-Anne Rye<sup>a\*</sup>

<sup>a</sup>School of Medical Sciences, Faculty of Medicine, UNSW Sydney

\*Correspondence to Professor Kerry-Anne Rye, Level 4 East, Wallace Wurth Building, Faculty of Medicine, School of Medical Science, UNSW Sydney, Sydney, Australia, NSW, 2052

Tel: +61 2 9385 1219; Fax: +61 2 9385 1797.

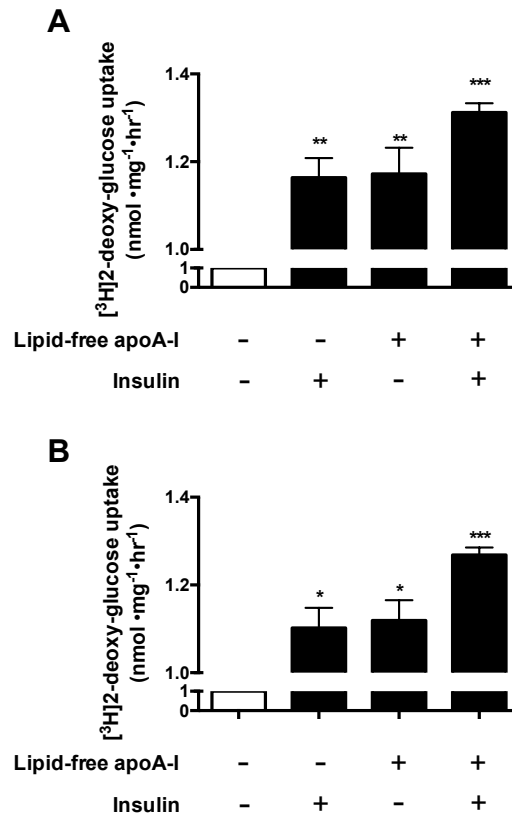

**Supplemental Figure I. ApoA-I increases glucose uptake into HSKMCs in an insulin-dependent and -independent manner under basal and high glucose conditions.** HSKMCs were incubated at 37 °C for 16 h in serum-free MEM- $\alpha$  under (A) low (2.8 mmol) glucose conditions and (B) high (25 mmol) glucose conditions with or without apoA-I (1 mg/mL final concentration). The apoA-I was removed and the cells were incubated at 37 °C for 1 h with or without insulin (0.1  $\mu$ mol/L final concentration). Glucose uptake was determined as described in Materials and Methods. Values represent the mean $\pm$ SD of three independent experiments. Glucose uptake was normalized to 1 nmol/mg/h for cells incubated under basal conditions (open bar).

\* $p$ <0.05, \*\* $p$ <0.01, \*\*\* $p$ <0.001 vs. incubation under basal conditions.

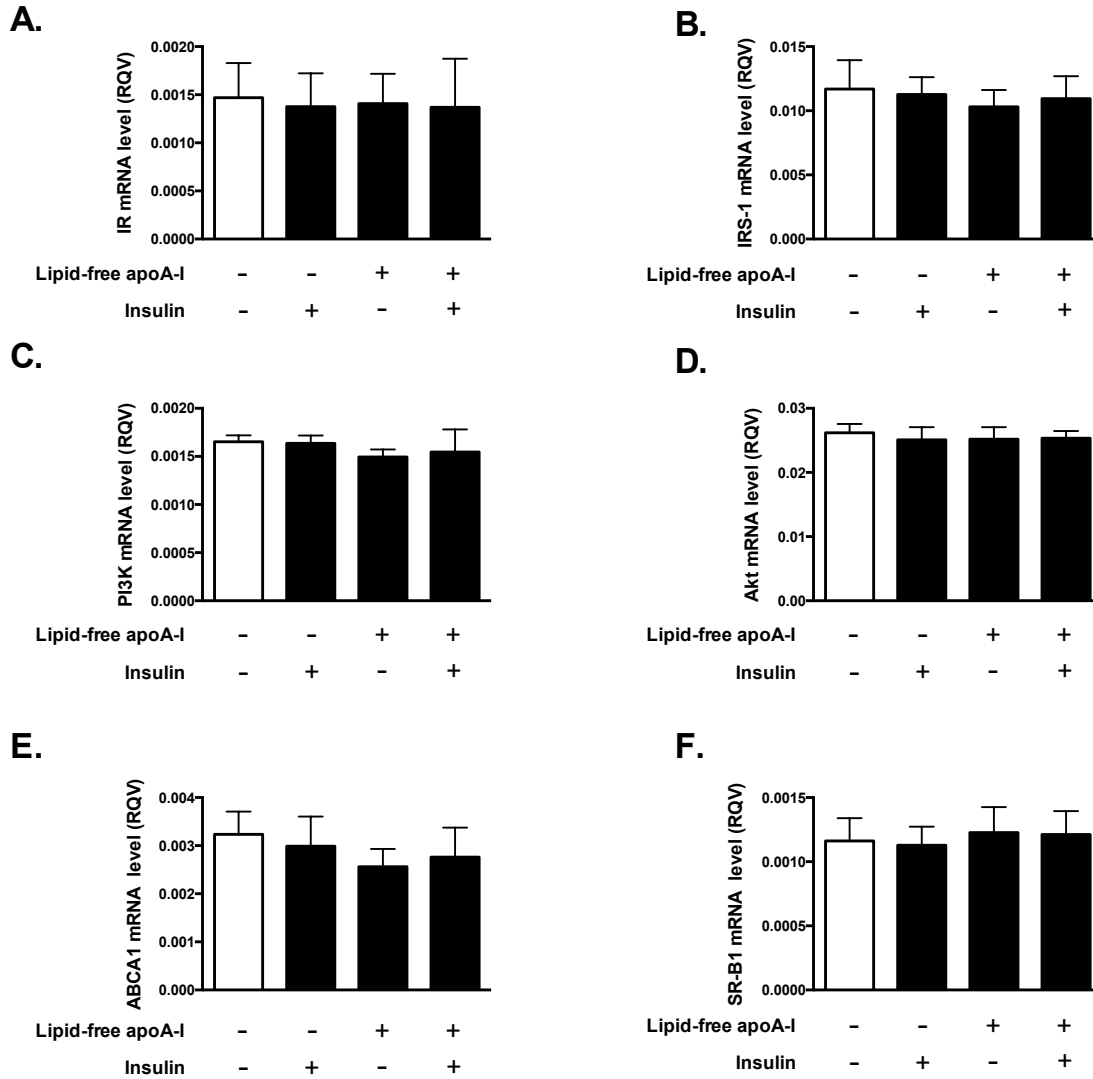

**Supplemental Figure II. ApoA-I does not alter IR, IRS1, PI3K, Akt, ABCA1 or SR-B1 mRNA levels.** HSKMCs were incubated at 37 °C for 16 h in serum-free MEM- $\alpha$  with or without apoA-I (1 mg/mL final concentration). The apoA-I was removed and the cells were incubated at 37 °C for 1 h with or without insulin (0.1  $\mu$ mol/L final concentration). mRNA levels of (A) IR, (B) IRS-1, (C) PI3K, (D) Akt, (E) ABCA1 and (F) SR-B1 were measured by real time PCR. Values represent the mean $\pm$ SD of three independent experiments.

**Supplemental Table I: Sequence of oligonucleotide primers.**

| Target Gene    | Primer Sequence                 |
|----------------|---------------------------------|
| IR             | F: 5'-CTGTAGTCCCAGTGCTAATC-3'   |
|                | R: 5'-ATAAAATCGGCATTCCCTGT-3'   |
| IRS-1          | F: 5'-ACTTGAGCTACGGTGACGTG-3'   |
|                | R: 5'-GCGGAACTCATCACTCATGG-3'   |
| Akt            | F: 5'-TGAACGAGTTTGAGTACCTG-3'   |
|                | R: 5'-GGATCTTCATGGCGTAGTAG-3'   |
| PI3K           | F: 5'-TGACGCTTTCAAACGCTATC-3'   |
|                | R: 5'-CAGAGAGTACTCTTGCAATTC-3'  |
|                | R: 5'-ACCCCAATGTTGTACCCAAACT-3' |
| ABCA1          | F: 5'-GAGCGGGTCAGCAAAGCAA-3'    |
|                | R: 5'-GTCCAATGCCTGCGACAGAT-3'   |
| SR-B1          | F: 5'-GCACACTCCTTGTTCTGG-3'     |
|                | R: 5'-GTCCAATGCCTGCGACAGAT-3'   |
| GLUT4          | F: 5'-GCACACTCCTTGTTCTGG-3'     |
|                | R: 5'-GTCCAATGCCTGCGACAGAT-3'   |
| $\beta$ -actin | F: 5'-CGGGAAATCGTGCGTGACAT-3'   |
|                | R: 5'-AAGGAAGGCTGGAAGAGTGC-3'   |

**Full blot Fig. 2A.**

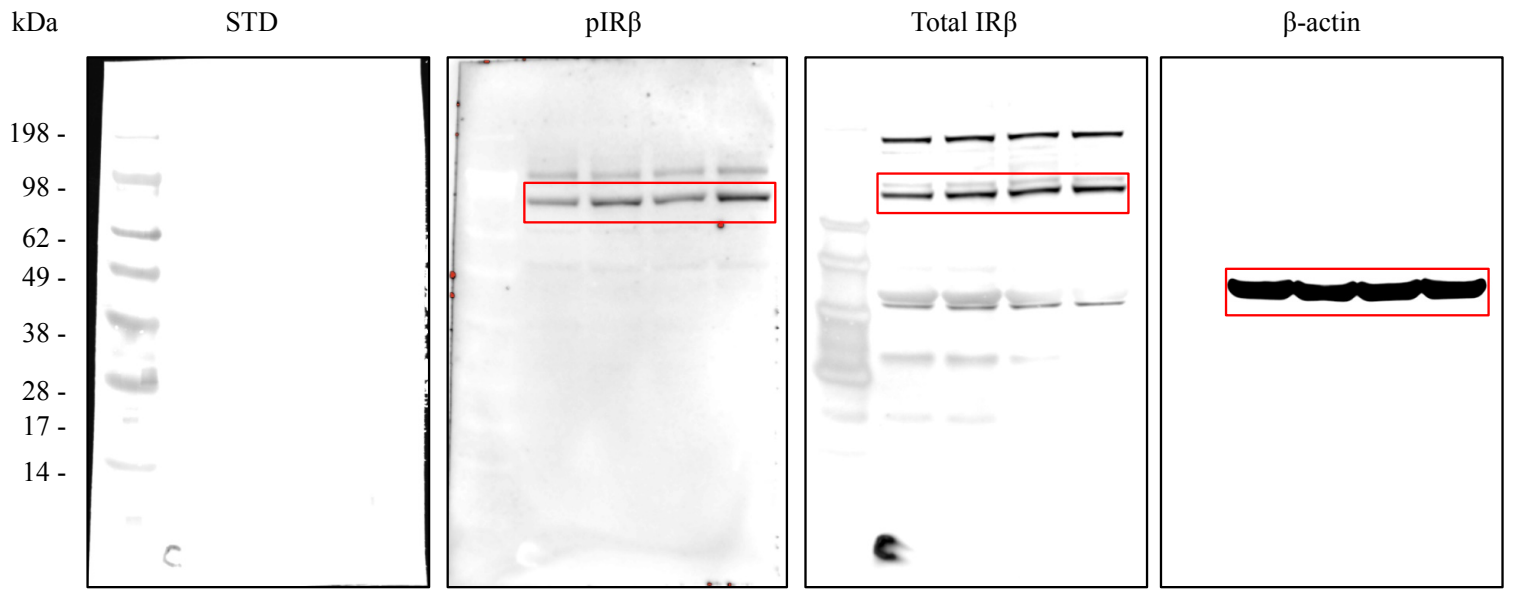

**Full blot Fig. 2B.**

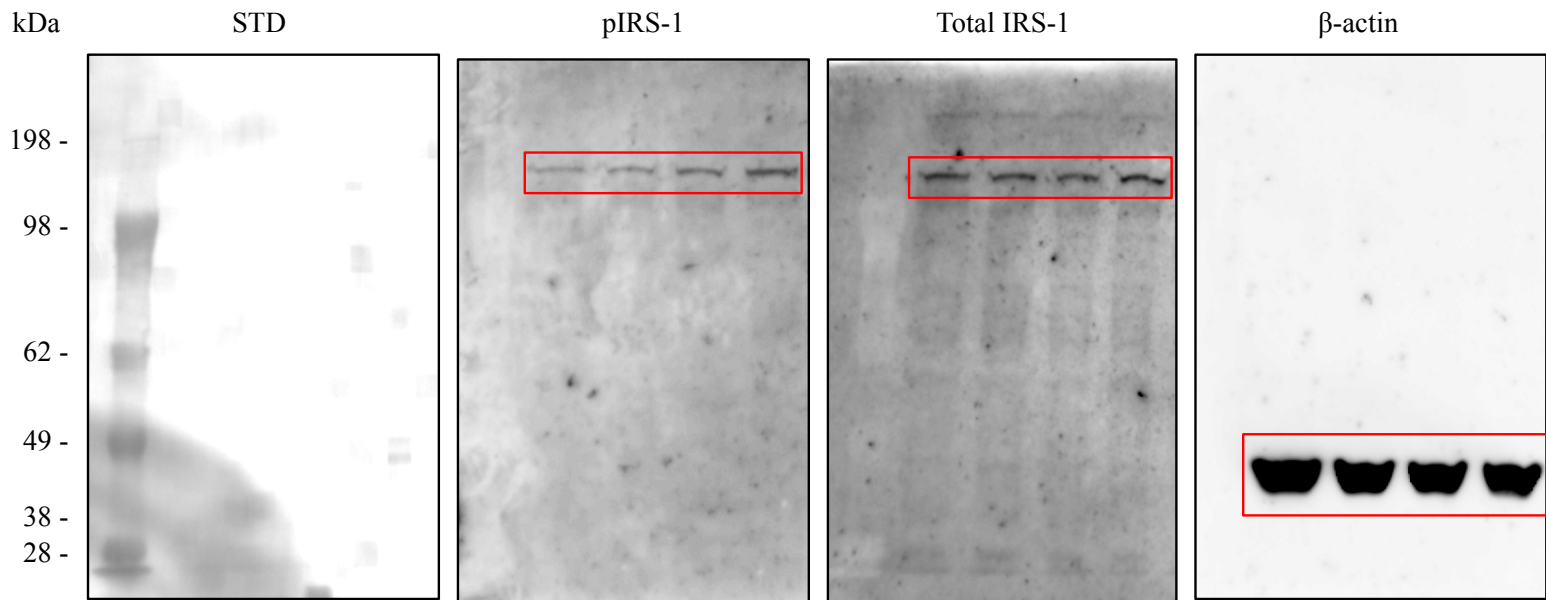

**Full blot Fig. 2C.**

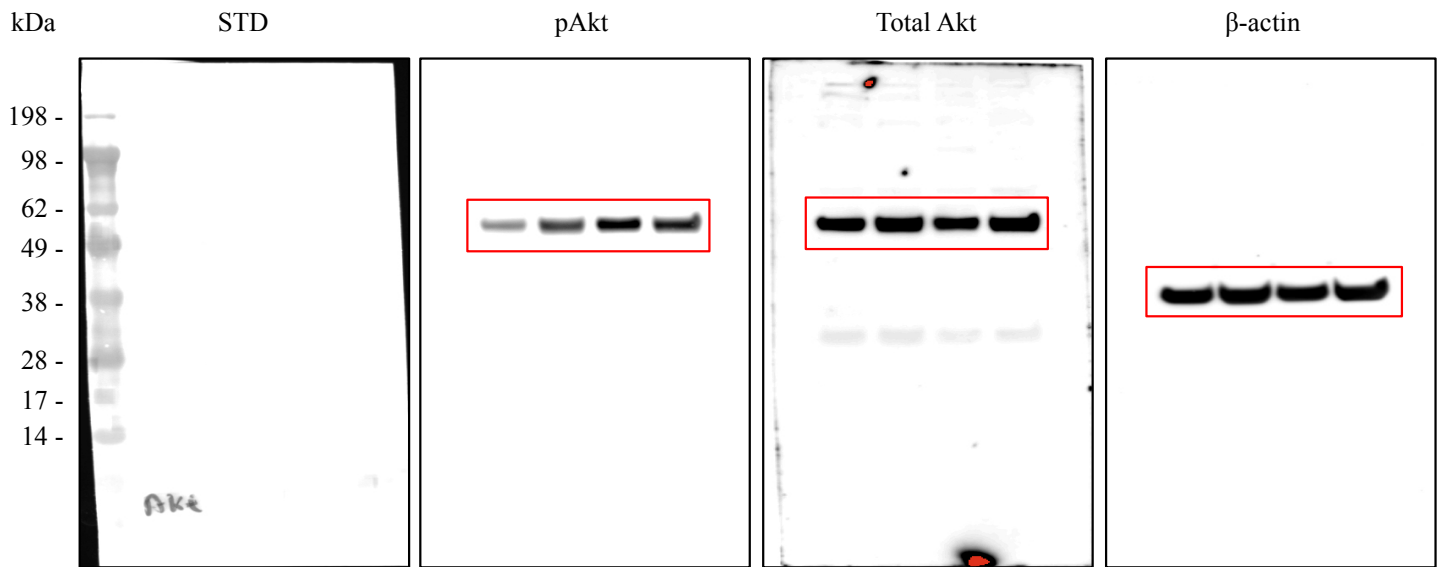

**Full blot Fig. 2D.**

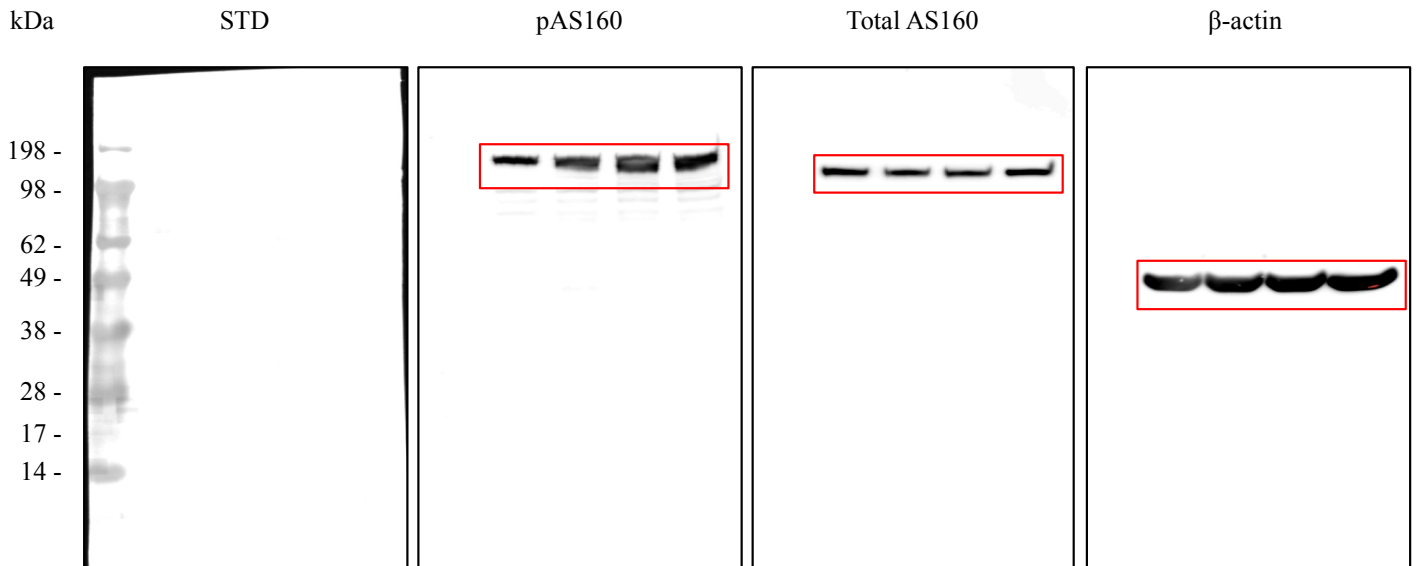

**Full blot Fig. 3A.**

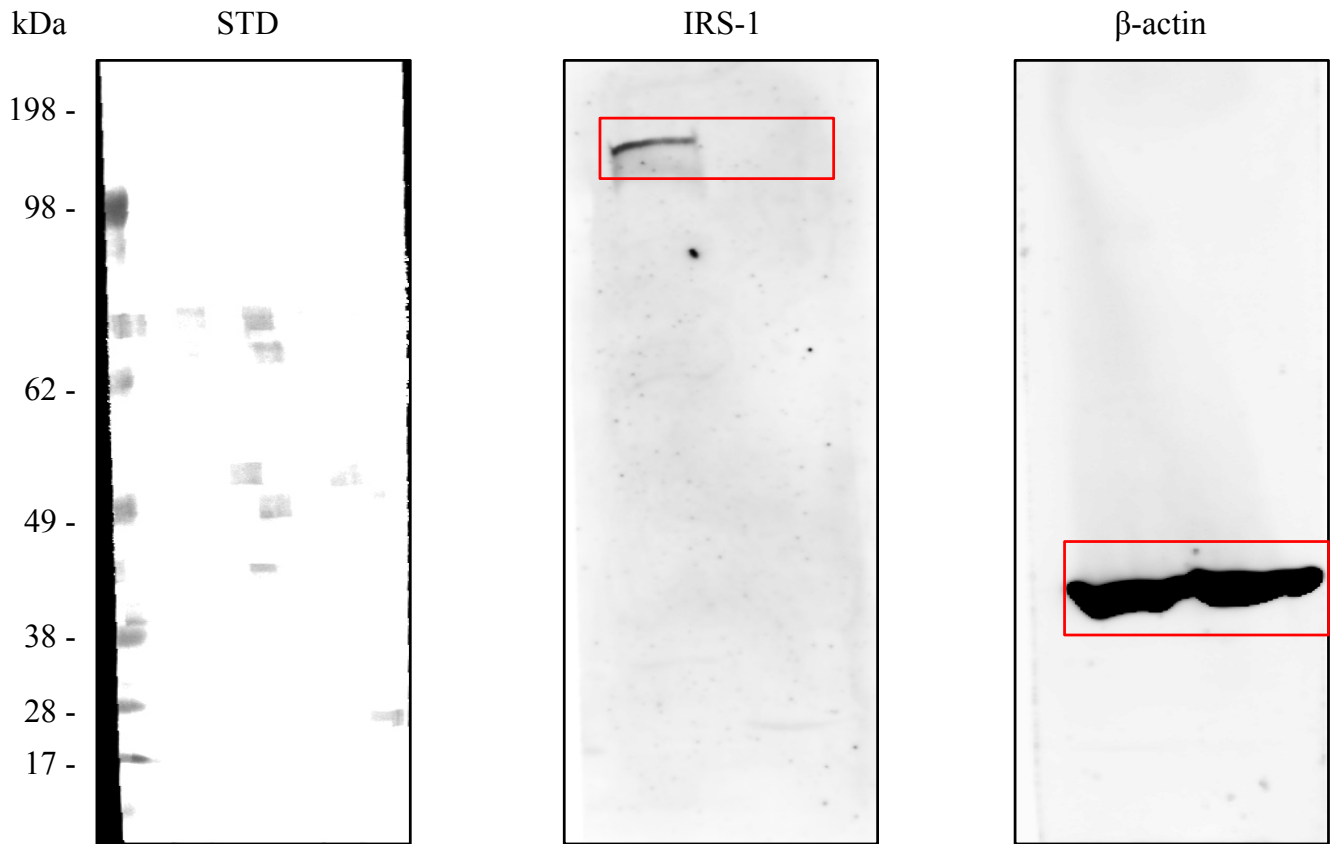

**Full blot Fig. 3C.**

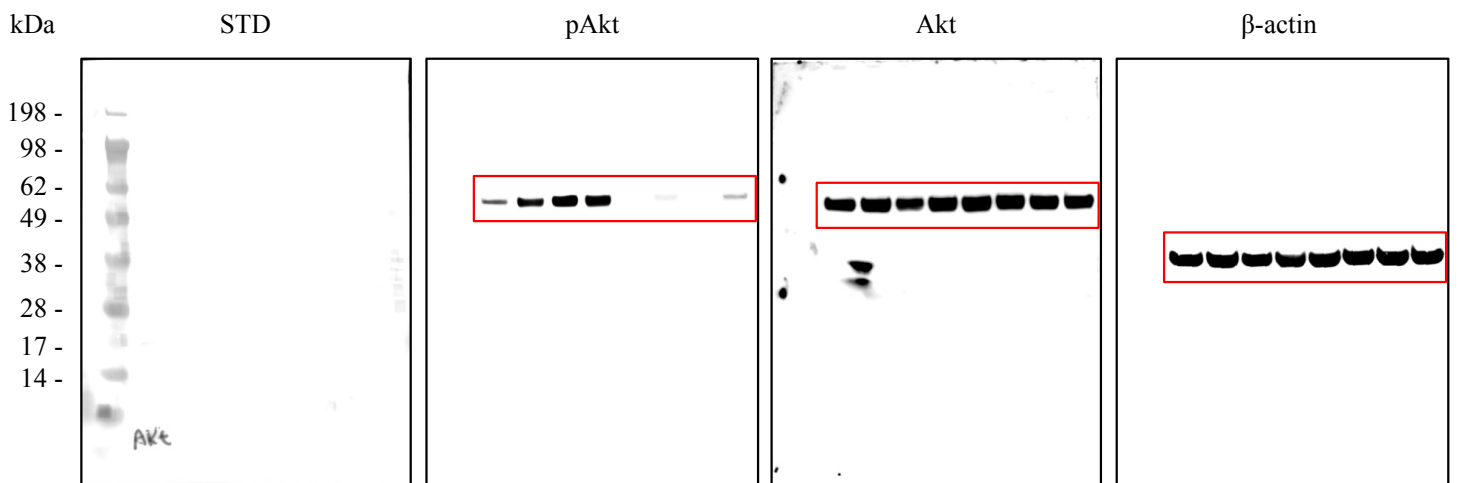

**Full blot Fig. 3D.**

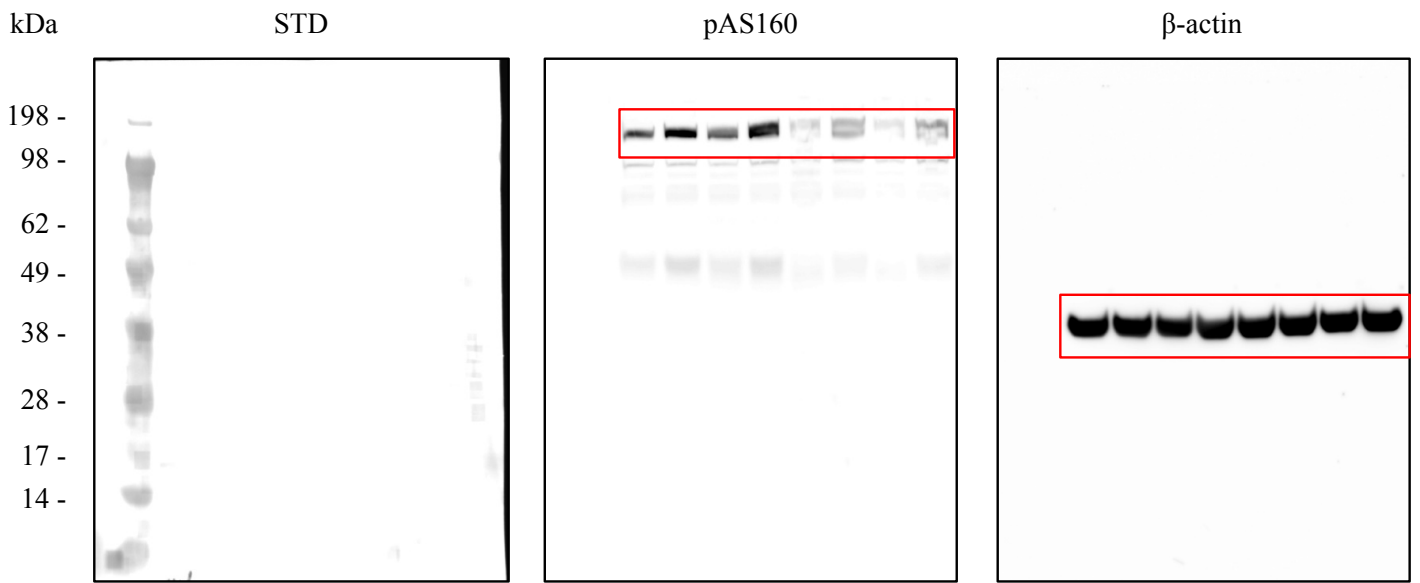

**Full blot Fig. 3E.**

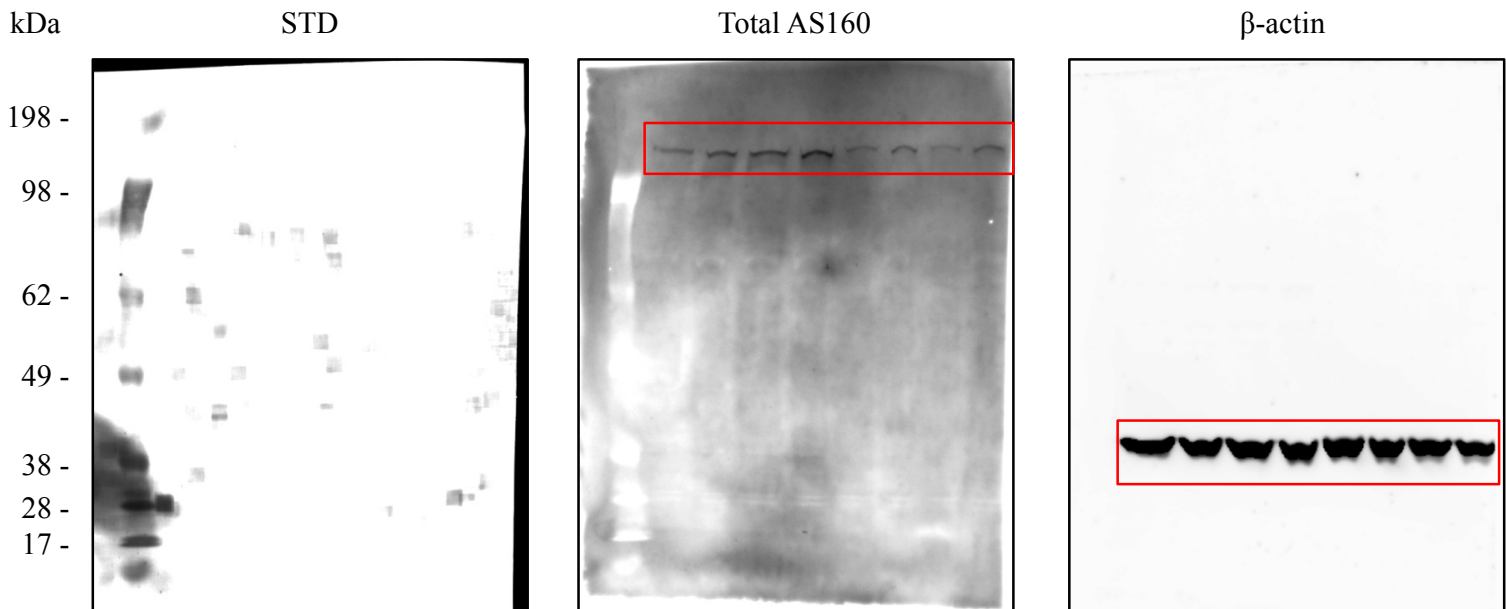



**Full blot Fig. 4B**

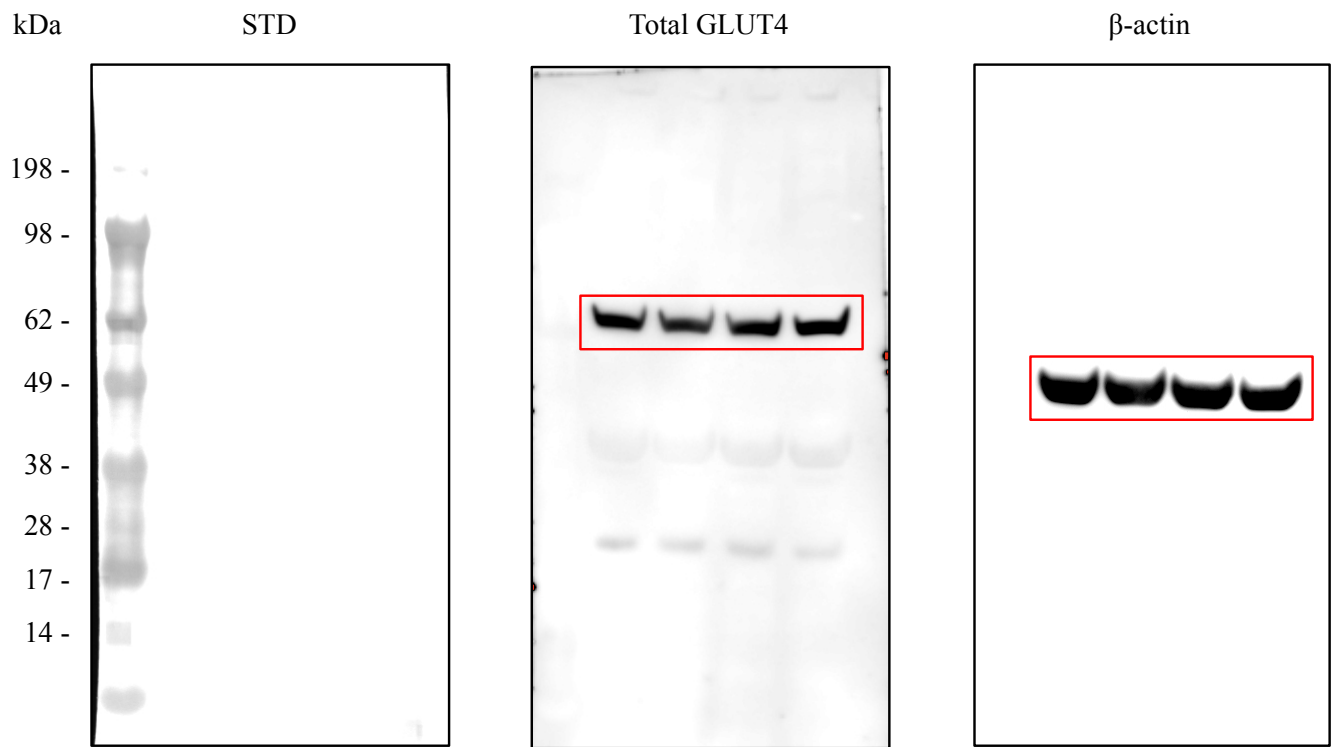

**Full blot Fig. 5A.**

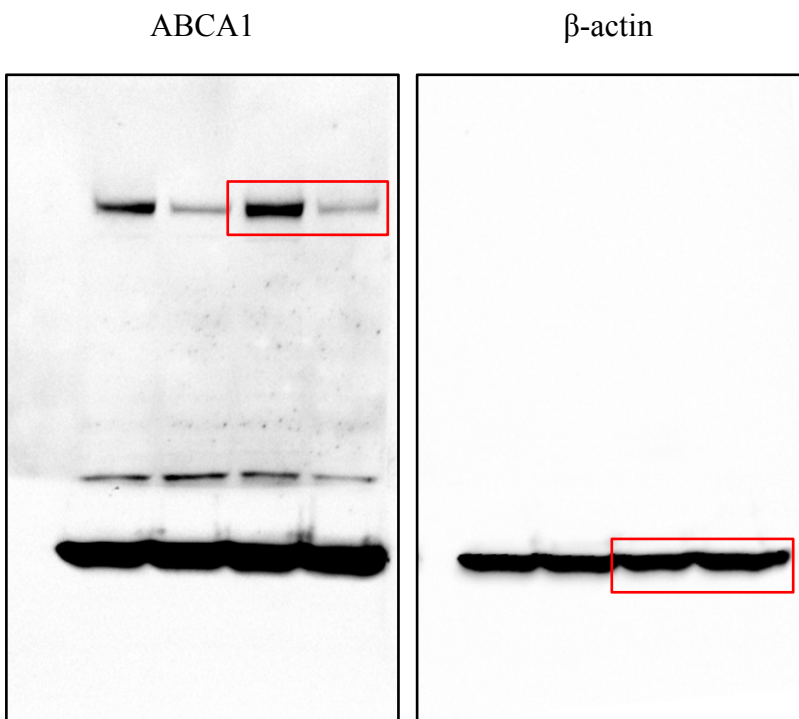

**Full blot Fig. 5B.**

SR-B1

$\beta$ -actin

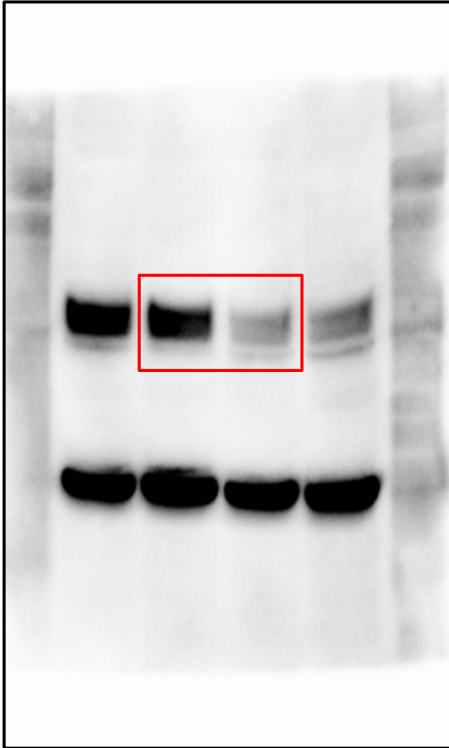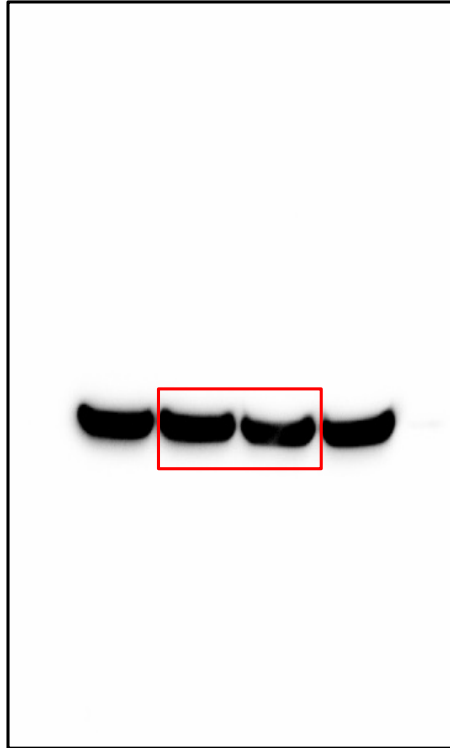

Supplement: 41598_2018_38014_MOESM1_ESM.pdf [file 41598_2018_38014_MOESM1_ESM.pdf]
